# Supplementary material for: Differential Transcriptomic Profiles in Canine Intestinal Organoids Following Lipopolysaccharide Stimulation
Source: Research Square preprint supplement (doi:10.21203/rs.3.rs-967308/v1), 2022-01-05
Supplement: Supplementary file 1 [file 32d624eab633f5af65bf7f63.xlsx]

## Sheet: Table-S4A
Table-S4A: Gene Ontology (GO) analysis of 11 DEGs (annotated for biological process) in control IBD colonoids versus control IBD enteroids.
GO-Terms	#Seqs	Probe Set ID
GO-Terms	#Seqs
Nitrogen compound metabolic process	7	Cfa.3774.1.A1_s_at, CfaAffx.4748.1.S1_at, Cfa.20798.1.S1_at, Cfa.6294.1.A1_at, Cfa.20396.1.S1_at, Cfa.3780.1.S1_at, CfaAffx.15227.1.S1_s_at
Organic substance metabolic process	7	Cfa.3774.1.A1_s_at, CfaAffx.4748.1.S1_at, Cfa.20798.1.S1_at, Cfa.6294.1.A1_at, Cfa.20396.1.S1_at, Cfa.3780.1.S1_at, CfaAffx.15227.1.S1_s_at
Regulation of cellular process	7	Cfa.3796.1.A1_s_at, Cfa.3774.1.A1_s_at, Cfa.12506.3.S1_at, CfaAffx.29036.1.S1_at, Cfa.6294.1.A1_at, Cfa.3780.1.S1_at, CfaAffx.15227.1.S1_s_at
Cellular metabolic process	7	CfaAffx.13785.1.S1_at, Cfa.3774.1.A1_s_at, CfaAffx.4748.1.S1_at, Cfa.6294.1.A1_at, Cfa.6413.1.A1_at, Cfa.3780.1.S1_at, CfaAffx.15227.1.S1_s_at
Primary metabolic process	7	Cfa.3774.1.A1_s_at, CfaAffx.4748.1.S1_at, Cfa.20798.1.S1_at, Cfa.6294.1.A1_at, Cfa.20396.1.S1_at, Cfa.3780.1.S1_at, CfaAffx.15227.1.S1_s_at
Negative regulation of cellular process	4	Cfa.3796.1.A1_s_at, CfaAffx.29036.1.S1_at, Cfa.3780.1.S1_at, CfaAffx.15227.1.S1_s_at
Regulation of biological quality	4	Cfa.12168.1.A1_s_at, Cfa.3774.1.A1_s_at, CfaAffx.29036.1.S1_at, Cfa.6294.1.A1_at
Small molecule metabolic process	4	CfaAffx.13785.1.S1_at, CfaAffx.4748.1.S1_at, Cfa.6413.1.A1_at, Cfa.6294.1.A1_at
Regulation of metabolic process	3	Cfa.6294.1.A1_at, Cfa.3780.1.S1_at, CfaAffx.15227.1.S1_s_at
Macromolecule localization	3	Cfa.3796.1.A1_s_at, Cfa.12168.1.A1_s_at, Cfa.6294.1.A1_at
Establishment of localization	3	Cfa.3796.1.A1_s_at, Cfa.12168.1.A1_s_at, Cfa.6294.1.A1_at
Cell communication	3	Cfa.12168.1.A1_s_at, Cfa.3774.1.A1_s_at, Cfa.12506.3.S1_at
Response to stress	3	Cfa.6294.1.A1_at, Cfa.3780.1.S1_at, CfaAffx.15227.1.S1_s_at
Anatomical structure morphogenesis	3	Cfa.3774.1.A1_s_at, Cfa.18759.2.S1_at, CfaAffx.27421.1.S1_at
Regulation of molecular function	3	Cfa.6294.1.A1_at, Cfa.3780.1.S1_at, CfaAffx.15227.1.S1_s_at
Regulation of hydrolase activity	3	Cfa.6294.1.A1_at, Cfa.3780.1.S1_at, CfaAffx.15227.1.S1_s_at
Regulation of localization	3	Cfa.3796.1.A1_s_at, CfaAffx.29036.1.S1_at, Cfa.6294.1.A1_at
Anatomical structure development	3	Cfa.3774.1.A1_s_at, Cfa.18759.2.S1_at, CfaAffx.27421.1.S1_at
Anatomical structure formation involved in morphogenesis	2	Cfa.3774.1.A1_s_at, CfaAffx.27421.1.S1_at
Cellular component organization or biogenesis	2	Cfa.6294.1.A1_at, CfaAffx.27421.1.S1_at
Catabolic process	2	Cfa.3774.1.A1_s_at, Cfa.6294.1.A1_at
Signal transduction	2	Cfa.3774.1.A1_s_at, Cfa.12506.3.S1_at
System process	2	Cfa.3774.1.A1_s_at, Cfa.6294.1.A1_at
Response to biotic stimulus	2	Cfa.3780.1.S1_at, CfaAffx.15227.1.S1_s_at
Biosynthetic process	2	CfaAffx.4748.1.S1_at, Cfa.6294.1.A1_at
Immune response	2	Cfa.3780.1.S1_at, CfaAffx.15227.1.S1_s_at
Positive regulation of cellular process	2	Cfa.3796.1.A1_s_at, Cfa.6294.1.A1_at
Response to external stimulus	2	Cfa.3780.1.S1_at, CfaAffx.15227.1.S1_s_at
Cellular response to stimulus	2	Cfa.3774.1.A1_s_at, Cfa.12506.3.S1_at
Negative regulation of metabolic process	2	Cfa.3780.1.S1_at, CfaAffx.15227.1.S1_s_at
Cell death	2	CfaAffx.29036.1.S1_at, CfaAffx.27421.1.S1_at
Negative regulation of catalytic activity	2	Cfa.3780.1.S1_at, CfaAffx.15227.1.S1_s_at
Cellular developmental process	2	Cfa.3774.1.A1_s_at, CfaAffx.27421.1.S1_at
Response to other organism	2	Cfa.3780.1.S1_at, CfaAffx.15227.1.S1_s_at
Multicellular organism development	2	Cfa.3774.1.A1_s_at, CfaAffx.27421.1.S1_at
Negative regulation of transport	1	Cfa.3796.1.A1_s_at
Cell-cell signaling	1	Cfa.12168.1.A1_s_at
Regulation of plasma lipoprotein particle levels	1	Cfa.6294.1.A1_at
Regulation of signaling	1	Cfa.12506.3.S1_at
Cell population proliferation	1	CfaAffx.29036.1.S1_at
Regulation of multicellular organismal process	1	Cfa.6294.1.A1_at
Negative regulation of establishment of protein localization	1	Cfa.3796.1.A1_s_at
Positive regulation of catalytic activity	1	Cfa.6294.1.A1_at
Cell motility	1	CfaAffx.29036.1.S1_at
Plasma lipoprotein particle organization	1	Cfa.6294.1.A1_at
Ensheathment of neurons	1	CfaAffx.27421.1.S1_at
Biological process involved in symbiotic interaction	1	Cfa.3774.1.A1_s_at
Regulation of response to stimulus	1	Cfa.12506.3.S1_at
Movement of cell or subcellular component	1	CfaAffx.29036.1.S1_at
Export from cell	1	Cfa.12168.1.A1_s_at
Positive regulation of transport	1	Cfa.3796.1.A1_s_at
Cell adhesion	1	Cfa.9240.1.S1_at
Localization of cell	1	CfaAffx.29036.1.S1_at
Digestion	1	Cfa.6294.1.A1_at
Response to chemical	1	Cfa.6294.1.A1_at
Ossification	1	Cfa.9240.1.S1_at
Cellular localization	1	Cfa.3796.1.A1_s_at
Positive regulation of metabolic process	1	Cfa.6294.1.A1_at
Positive regulation of establishment of protein localization	1	Cfa.3796.1.A1_s_at
Regulation of locomotion	1	CfaAffx.29036.1.S1_at
Vesicle-mediated transport	1	Cfa.3796.1.A1_s_at

## Sheet: Table-S4B
Table-S4B: Gene Ontology (GO) analysis of 11 DEGs (annotated for molecular function) in control IBD colonoids versus control IBD enteroids.
GO-Terms	#Seqs	Probe Set ID
Metal ion binding	5	Cfa.3796.1.A1_s_at, CfaAffx.13785.1.S1_at, Cfa.3774.1.A1_s_at, Cfa.20798.1.S1_at, Cfa.6413.1.A1_at
Metallopeptidase activity	2	Cfa.3774.1.A1_s_at, Cfa.20798.1.S1_at
Peptidase inhibitor activity	2	Cfa.3780.1.S1_at, CfaAffx.15227.1.S1_s_at
Hydro-lyase activity	2	CfaAffx.13785.1.S1_at, Cfa.6413.1.A1_at
Endopeptidase regulator activity	2	Cfa.3780.1.S1_at, CfaAffx.15227.1.S1_s_at
Exopeptidase activity	2	Cfa.3774.1.A1_s_at, Cfa.20798.1.S1_at
RNA binding	2	Cfa.5781.1.A1_s_at, Cfa.334.1.A1_s_at
Transferase activity, transferring acyl groups other than amino-acyl groups	1	CfaAffx.4748.1.S1_at
Aspartic-type peptidase activity	1	Cfa.20396.1.S1_at
Calcium-dependent phospholipid binding	1	Cfa.3796.1.A1_s_at
Sterol binding	1	Cfa.6294.1.A1_at
Endopeptidase activity	1	Cfa.20396.1.S1_at
Thiolester hydrolase activity	1	CfaAffx.4748.1.S1_at
SH3 Domain binding	1	Cfa.334.1.A1_s_at
Sulfotransferase activity	1	CfaAffx.4011.1.S1_at
Carboxylic ester hydrolase activity	1	CfaAffx.13785.1.S1_at
Insulin-like growth factor binding	1	Cfa.12506.3.S1_at
Phosphatidylglycerol binding	1	Cfa.3796.1.A1_s_at
Cholesterol binding	1	Cfa.6294.1.A1_at
Phosphatidylcholine-sterol O-acyltransferase activator activity	1	Cfa.6294.1.A1_at

## Sheet: Table-S4C
Table-S4C: Gene Ontology (GO) analysis of 11 DEGs (annotated for cellular component) in control IBD colonoids versus control IBD enteroids.
GO-Terms	#Seqs	Probe Set ID
Intracellular anatomical structure	11	Cfa.3796.1.A1_s_at, CfaAffx.26061.1.S1_at, CfaAffx.13785.1.S1_at, Cfa.3774.1.A1_s_at, Cfa.7074.1.A1_at, Cfa.12506.3.S1_at, CfaAffx.4748.1.S1_at, CfaAffx.29036.1.S1_at, Cfa.6413.1.A1_at, Cfa.20396.1.S1_at, Cfa.334.1.A1_s_at
Membrane	10	Cfa.3796.1.A1_s_at, CfaAffx.26061.1.S1_at, Cfa.3774.1.A1_s_at, Cfa.7074.1.A1_at, CfaAffx.29036.1.S1_at, Cfa.5134.1.A1_s_at, Cfa.20396.1.S1_at, CfaAffx.27421.1.S1_at, Cfa.10739.1.A1_s_at, Cfa.20456.1.S1_s_at
Cytoplasm	9	Cfa.3796.1.A1_s_at, CfaAffx.13785.1.S1_at, CfaAffx.26061.1.S1_at, Cfa.3774.1.A1_s_at, Cfa.12506.3.S1_at, CfaAffx.4748.1.S1_at, CfaAffx.29036.1.S1_at, Cfa.6413.1.A1_at, Cfa.20396.1.S1_at
Extracellular region	8	Cfa.12168.1.A1_s_at, Cfa.3774.1.A1_s_at, Cfa.12506.3.S1_at, Cfa.9240.1.S1_at, Cfa.6294.1.A1_at, Cfa.5134.1.A1_s_at, Cfa.3780.1.S1_at, CfaAffx.15227.1.S1_s_at
Intrinsic component of membrane	8	CfaAffx.26061.1.S1_at, Cfa.3774.1.A1_s_at, CfaAffx.29036.1.S1_at, Cfa.5134.1.A1_s_at, Cfa.10739.1.A1_s_at, Cfa.20396.1.S1_at, CfaAffx.27421.1.S1_at, Cfa.20456.1.S1_s_at
Organelle	7	Cfa.3796.1.A1_s_at, CfaAffx.26061.1.S1_at, Cfa.3774.1.A1_s_at, Cfa.12506.3.S1_at, CfaAffx.4748.1.S1_at, Cfa.20396.1.S1_at, Cfa.334.1.A1_s_at
Cell periphery	7	Cfa.3796.1.A1_s_at, CfaAffx.26061.1.S1_at, Cfa.3774.1.A1_s_at, Cfa.7074.1.A1_at, CfaAffx.29036.1.S1_at, Cfa.20396.1.S1_at, CfaAffx.27421.1.S1_at
Extracellular space	6	Cfa.3774.1.A1_s_at, Cfa.12506.3.S1_at, Cfa.5134.1.A1_s_at, Cfa.6294.1.A1_at, Cfa.3780.1.S1_at, CfaAffx.15227.1.S1_s_at
Apical part of cell	3	Cfa.3796.1.A1_s_at, CfaAffx.26061.1.S1_at, Cfa.7074.1.A1_at
Endomembrane system	3	Cfa.3796.1.A1_s_at, Cfa.12506.3.S1_at, Cfa.20396.1.S1_at

## Sheet: Table-S4D
Table-S4D: Details about top upregulated anddownregulated DEGs in control IBD colonoids versus control IBD enteroids.
Probe Set ID	Gene Description	Gene Symbol
CfaAffx.4011.1.S1_at	sulfotransferase 1C1	SULT1C1
Cfa.9240.1.S1_at	osteopontin isoform X2	SPP1
Cfa.6413.1.A1_at	carbonic anhydrase 1	CA1
Cfa.18759.2.S1_at	FRY microtubule binding protein	FRY
Cfa.12506.3.S1_at	insulin-like growth factor-binding protein 1	IGFBP1
CfaAffx.26061.1.S1_at	mucin-1	MUC1
CfaAffx.15227.1.S1_s_at	WAP four-disulfide core domain protein 2	WFDC2
Cfa.20396.1.S1_at	beta-secretase 2	BACE2
Cfa.5134.1.A1_s_at	glioma pathogenesis-related protein 1 isoform X1	GLIPR1
CfaAffx.22155.1.S1_s_at	ENSCAFT00000022799 XM_014110988.1 PREDICTED: Canis lupus familiaris fibronectin 1	FN1
Cfa.5781.1.A1_s_at	RNA-binding motif, single-stranded-interacting protein 1 isoform X3	RBMS1
Cfa.3780.1.S1_at	WAP four-disulfide core domain protein 2	WFDC2
CfaAffx.27421.1.S1_at	peripheral myelin protein 22	PMP22
Cfa.20456.1.S1_s_at	interferon alpha-inducible protein 6 isoform X1	IFI6
Cfa.334.1.A1_s_at	KH domain-containing, RNA-binding, signal transduction-associated protein 3 isoform X1	KHDRBS3
Cfa.12168.1.A1_s_at	protein FAM3B	FAM3B
Cfa.20798.1.S1_at	aminopeptidase N	ANPEP
CfaAffx.29036.1.S1_at	transmembrane and immunoglobulin domain-containing protein 1	TMIGD1
CfaAffx.4748.1.S1_at	bile acid-CoA:amino acid N-acyltransferase-like	BAAT
Cfa.3796.1.A1_s_at	annexin A13 isoform X1	ANXA13
Cfa.3774.1.A1_s_at	aminopeptidase N	ANPEP
Cfa.6294.1.A1_at	apolipoprotein A-IV	APOA4
