# Supplementary material for: Differential Transcriptomic Profiles in Canine Intestinal Organoids Following Lipopolysaccharide Stimulation
Source: Research Square preprint supplement (doi:10.21203/rs.3.rs-967308/v1), 2022-01-05
Supplement: Supplementary file 1 [file a67a7fc84f1508d4a9539464.docx]

**(a)**


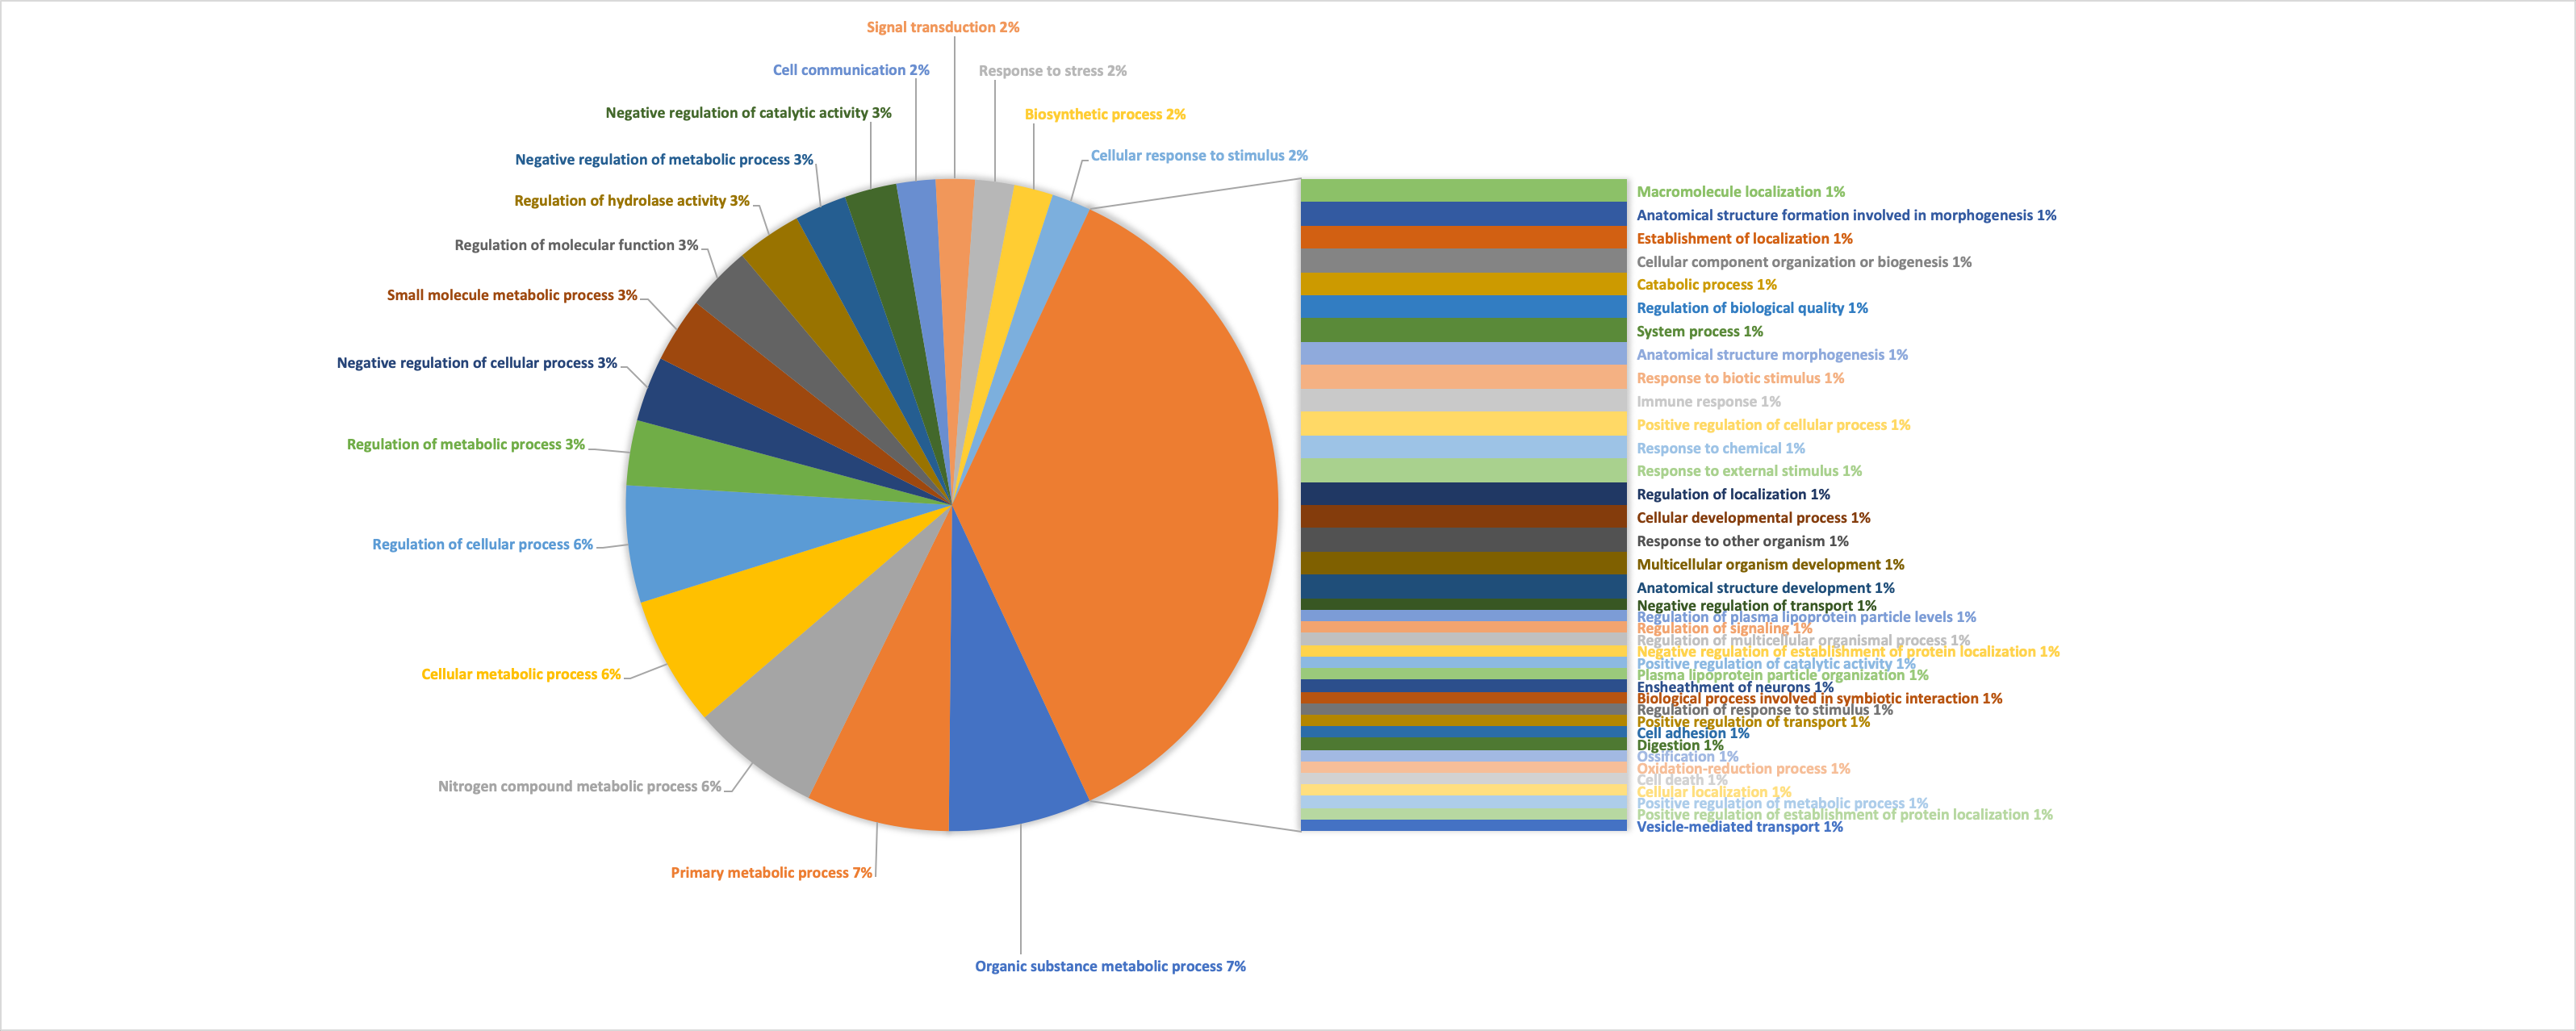


**(b)**


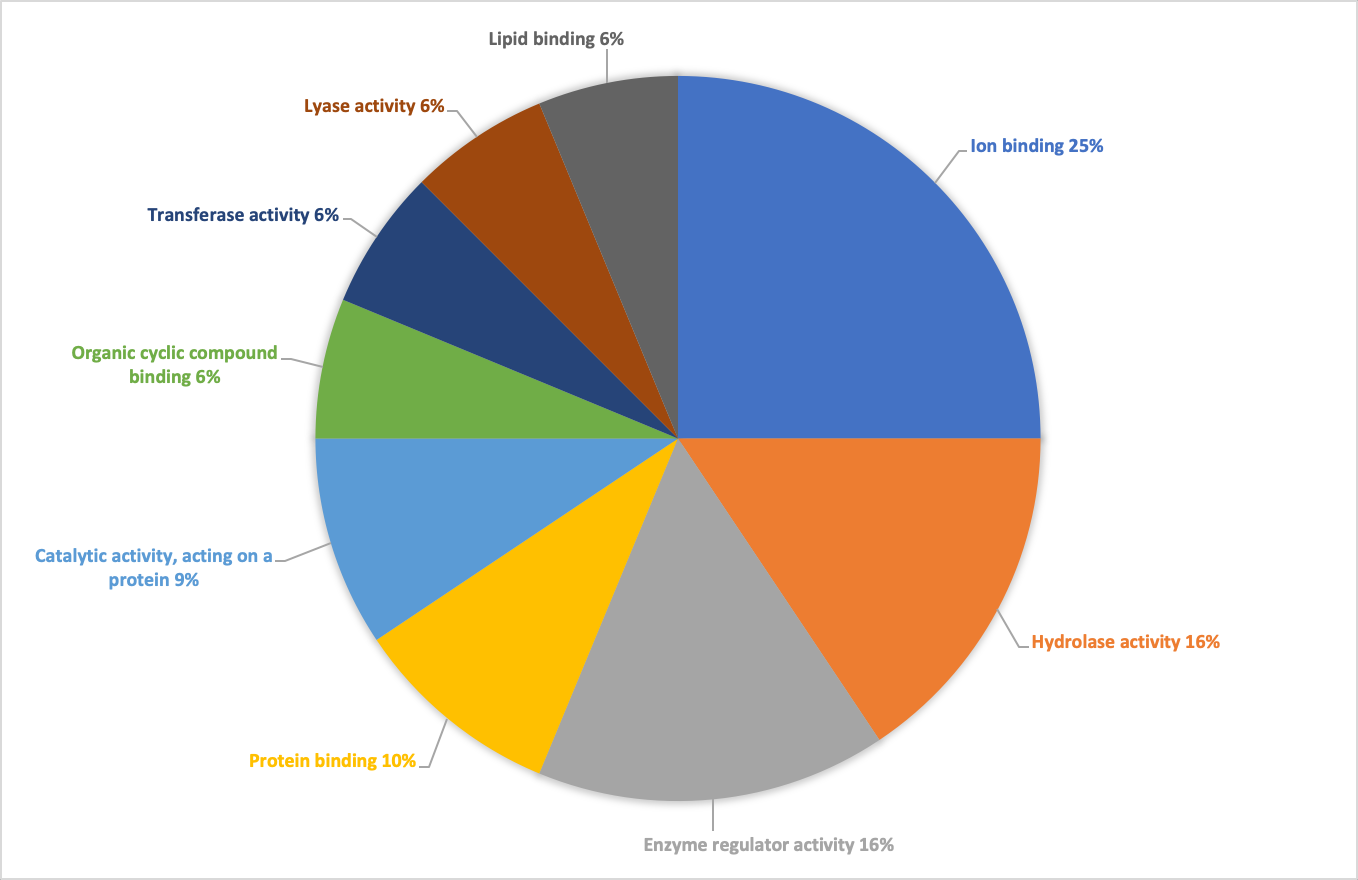


**(c)**


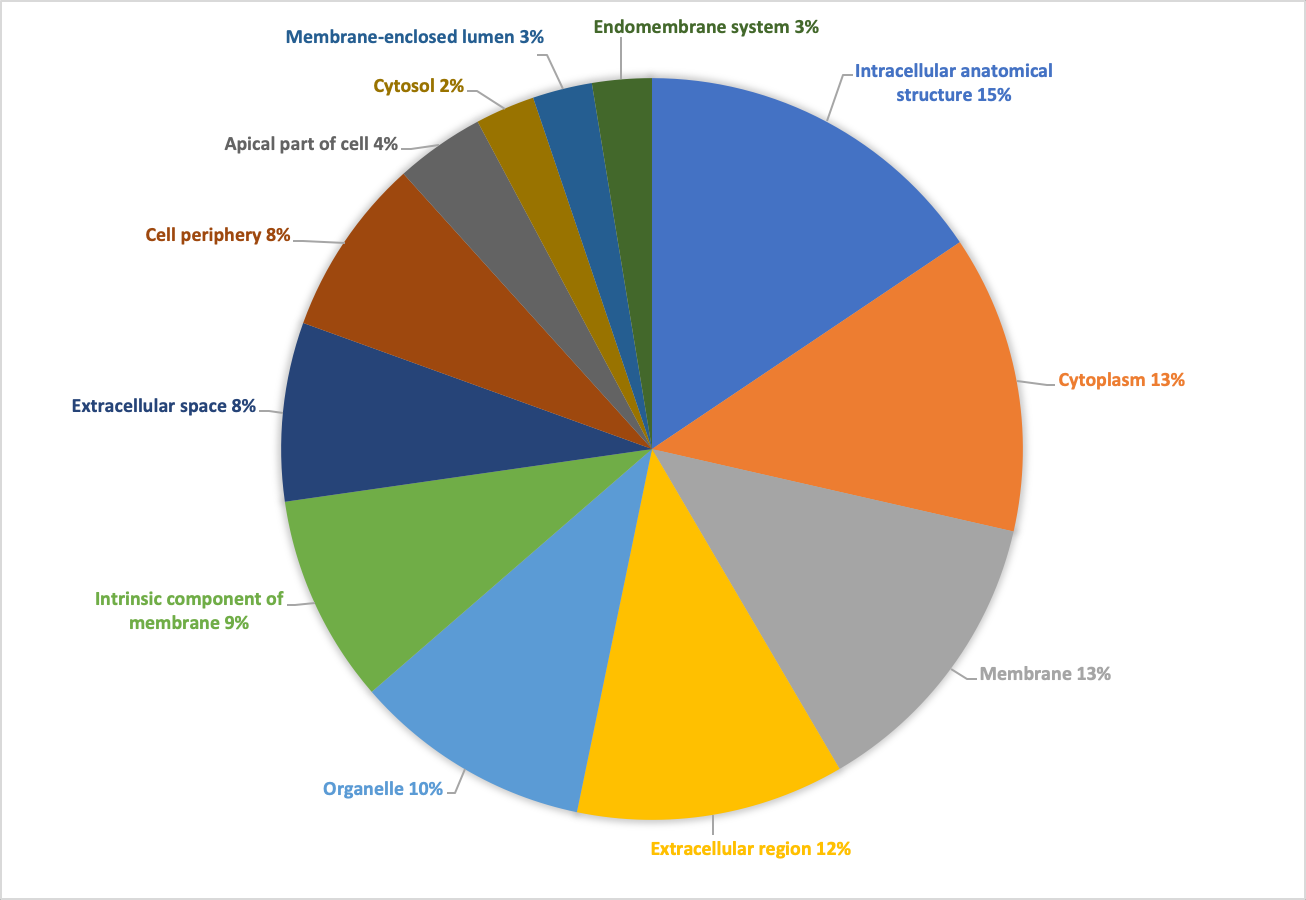


**Figure S5.** Gene Ontology (GO) analysis of top 50 upregulated and 10 downregulated DEGs in control IBD enteroids versus control tumor enteroids. The pie graphs show 25 genes annotated for (a) biological process, (b) molecular function and (c) cellular component categories. The numbers in parentheses show the percentage of total genes in each functional category. The summary of genes in each functional category is represented in Table-S5A-C, and the detailed information of genes is presented in Table-S5D.
