# Supplementary material for: Differential Transcriptomic Profiles in Canine Intestinal Organoids Following Lipopolysaccharide Stimulation
Source: Research Square preprint supplement (doi:10.21203/rs.3.rs-967308/v1), 2022-01-05
Supplement: Supplementary file 3 [file c7169a38977582c8b8ed6ef8.xlsx]

## Sheet: Table-S7A
Table-S7A: Gene Ontology (GO) analysis of 11 DEGs (annotated for biological process) in LPS treated IBD enteroids versus LPS treated tumor enteroids.
GO-Terms	#Seqs	Probe Set ID
Regulation of cellular process	11	Cfa.4456.1.S1_at, Cfa.15806.1.S1_at, CfaAffx.31015.1.S1_at, Cfa.12271.1.A1_at, Cfa.16455.1.S1_at, CfaAffx.16198.1.S1_s_at, Cfa.6294.1.A1_at, Cfa.18640.1.S1_at, Cfa.3780.1.S1_at, CfaAffx.15227.1.S1_s_at, Cfa.21325.1.S1_s_at
Cellular metabolic process	10	Cfa.4456.1.S1_at, CfaAffx.13785.1.S1_at, CfaAffx.4748.1.S1_at, Cfa.15827.1.S1_s_at, Cfa.6294.1.A1_at, Cfa.18640.1.S1_at, Cfa.6413.1.A1_at, Cfa.3780.1.S1_at, CfaAffx.15227.1.S1_s_at, Cfa.21325.1.S1_s_at
Nitrogen compound metabolic process	9	Cfa.4456.1.S1_at, CfaAffx.4748.1.S1_at, Cfa.15827.1.S1_s_at, Cfa.6996.1.A1_at, Cfa.18640.1.S1_at, Cfa.6294.1.A1_at, Cfa.3780.1.S1_at, CfaAffx.15227.1.S1_s_at, Cfa.21325.1.S1_s_at
Organic substance metabolic process	9	Cfa.4456.1.S1_at, CfaAffx.4748.1.S1_at, Cfa.6996.1.A1_at, Cfa.15827.1.S1_s_at, Cfa.6294.1.A1_at, Cfa.18640.1.S1_at, Cfa.3780.1.S1_at, CfaAffx.15227.1.S1_s_at, Cfa.21325.1.S1_s_at
Primary metabolic process	9	Cfa.4456.1.S1_at, CfaAffx.4748.1.S1_at, Cfa.6996.1.A1_at, Cfa.15827.1.S1_s_at, Cfa.6294.1.A1_at, Cfa.18640.1.S1_at, Cfa.3780.1.S1_at, CfaAffx.15227.1.S1_s_at, Cfa.21325.1.S1_s_at
Regulation of molecular function	8	Cfa.4456.1.S1_at, Cfa.15806.1.S1_at, CfaAffx.31015.1.S1_at, Cfa.12271.1.A1_at, Cfa.6294.1.A1_at, Cfa.3780.1.S1_at, CfaAffx.15227.1.S1_s_at, Cfa.21325.1.S1_s_at
Cell communication	6	Cfa.15806.1.S1_at, CfaAffx.31015.1.S1_at, Cfa.12271.1.A1_at, Cfa.16455.1.S1_at, CfaAffx.16198.1.S1_s_at, Cfa.21325.1.S1_s_at
Signal transduction	6	Cfa.15806.1.S1_at, CfaAffx.31015.1.S1_at, Cfa.12271.1.A1_at, CfaAffx.16198.1.S1_s_at, Cfa.16455.1.S1_at, Cfa.21325.1.S1_s_at
response to stress	6	Cfa.15806.1.S1_at, CfaAffx.31015.1.S1_at, Cfa.16455.1.S1_at, Cfa.6294.1.A1_at, Cfa.3780.1.S1_at, CfaAffx.15227.1.S1_s_at
immune response	6	Cfa.15806.1.S1_at, CfaAffx.31015.1.S1_at, Cfa.16455.1.S1_at, Cfa.3780.1.S1_at, CfaAffx.15227.1.S1_s_at, Cfa.21325.1.S1_s_at
positive regulation of cellular process	6	Cfa.15806.1.S1_at, CfaAffx.31015.1.S1_at, Cfa.16455.1.S1_at, Cfa.6294.1.A1_at, Cfa.18640.1.S1_at, Cfa.21325.1.S1_s_at
regulation of hydrolase activity	6	Cfa.4456.1.S1_at, Cfa.15806.1.S1_at, CfaAffx.31015.1.S1_at, Cfa.6294.1.A1_at, Cfa.3780.1.S1_at, CfaAffx.15227.1.S1_s_at
cellular response to stimulus	6	Cfa.15806.1.S1_at, CfaAffx.31015.1.S1_at, Cfa.12271.1.A1_at, Cfa.16455.1.S1_at, CfaAffx.16198.1.S1_s_at, Cfa.21325.1.S1_s_at
regulation of metabolic process	5	Cfa.4456.1.S1_at, Cfa.6294.1.A1_at, Cfa.3780.1.S1_at, CfaAffx.15227.1.S1_s_at, Cfa.21325.1.S1_s_at
small molecule metabolic process	5	CfaAffx.13785.1.S1_at, CfaAffx.4748.1.S1_at, Cfa.6413.1.A1_at, Cfa.6294.1.A1_at, Cfa.18640.1.S1_at
response to biotic stimulus	5	Cfa.15806.1.S1_at, CfaAffx.31015.1.S1_at, Cfa.16455.1.S1_at, Cfa.3780.1.S1_at, CfaAffx.15227.1.S1_s_at
response to external stimulus	5	Cfa.15806.1.S1_at, CfaAffx.31015.1.S1_at, Cfa.16455.1.S1_at, Cfa.3780.1.S1_at, CfaAffx.15227.1.S1_s_at
response to other organism	5	Cfa.15806.1.S1_at, CfaAffx.31015.1.S1_at, Cfa.16455.1.S1_at, Cfa.3780.1.S1_at, CfaAffx.15227.1.S1_s_at
negative regulation of cellular process	4	Cfa.4456.1.S1_at, Cfa.16455.1.S1_at, Cfa.3780.1.S1_at, CfaAffx.15227.1.S1_s_at
regulation of biological quality	4	Cfa.16455.1.S1_at, CfaAffx.16198.1.S1_s_at, Cfa.6294.1.A1_at, Cfa.21325.1.S1_s_at
positive regulation of catalytic activity	4	Cfa.15806.1.S1_at, CfaAffx.31015.1.S1_at, Cfa.6294.1.A1_at, Cfa.21325.1.S1_s_at
cell motility	4	Cfa.15806.1.S1_at, CfaAffx.31015.1.S1_at, Cfa.16455.1.S1_at, Cfa.21325.1.S1_s_at
regulation of response to stimulus	4	Cfa.15806.1.S1_at, CfaAffx.31015.1.S1_at, Cfa.16455.1.S1_at, Cfa.21325.1.S1_s_at
movement of cell or subcellular component	4	Cfa.15806.1.S1_at, CfaAffx.31015.1.S1_at, Cfa.16455.1.S1_at, Cfa.21325.1.S1_s_at
biosynthetic process	4	CfaAffx.4748.1.S1_at, Cfa.15827.1.S1_s_at, Cfa.6294.1.A1_at, Cfa.18640.1.S1_at
localization of cell	4	Cfa.15806.1.S1_at, CfaAffx.31015.1.S1_at, Cfa.16455.1.S1_at, Cfa.21325.1.S1_s_at
response to chemical	4	Cfa.15806.1.S1_at, CfaAffx.31015.1.S1_at, Cfa.16455.1.S1_at, Cfa.6294.1.A1_at
positive regulation of response to stimulus	4	Cfa.15806.1.S1_at, CfaAffx.31015.1.S1_at, Cfa.16455.1.S1_at, Cfa.21325.1.S1_s_at
regulation of localization	4	Cfa.16455.1.S1_at, Cfa.6294.1.A1_at, Cfa.18640.1.S1_at, Cfa.21325.1.S1_s_at
negative regulation of catalytic activity	4	Cfa.4456.1.S1_at, Cfa.12271.1.A1_at, Cfa.3780.1.S1_at, CfaAffx.15227.1.S1_s_at
macromolecule localization	3	Cfa.6294.1.A1_at, Cfa.18640.1.S1_at, Cfa.21325.1.S1_s_at
taxis	3	Cfa.15806.1.S1_at, CfaAffx.31015.1.S1_at, Cfa.16455.1.S1_at
regulation of signaling	3	Cfa.15806.1.S1_at, CfaAffx.31015.1.S1_at, Cfa.21325.1.S1_s_at
establishment of localization	3	Cfa.6294.1.A1_at, Cfa.18640.1.S1_at, Cfa.21325.1.S1_s_at
regulation of multicellular organismal process	3	Cfa.16455.1.S1_at, Cfa.6294.1.A1_at, Cfa.21325.1.S1_s_at
leukocyte migration	3	Cfa.15806.1.S1_at, CfaAffx.31015.1.S1_at, Cfa.16455.1.S1_at
system process	3	CfaAffx.16198.1.S1_s_at, Cfa.6294.1.A1_at, Cfa.21325.1.S1_s_at
negative regulation of metabolic process	3	Cfa.4456.1.S1_at, Cfa.3780.1.S1_at, CfaAffx.15227.1.S1_s_at
positive regulation of signaling	3	Cfa.15806.1.S1_at, CfaAffx.31015.1.S1_at, Cfa.21325.1.S1_s_at
cellular component organization or biogenesis	2	Cfa.6294.1.A1_at, Cfa.21325.1.S1_s_at
catabolic process	2	Cfa.6996.1.A1_at, Cfa.6294.1.A1_at
tissue migration	2	Cfa.16455.1.S1_at, Cfa.21325.1.S1_s_at
digestion	2	CfaAffx.16198.1.S1_s_at, Cfa.6294.1.A1_at
positive regulation of metabolic process	2	Cfa.6294.1.A1_at, Cfa.21325.1.S1_s_at
regulation of locomotion	2	Cfa.16455.1.S1_at, Cfa.21325.1.S1_s_at
negative regulation of response to stimulus	1	Cfa.16455.1.S1_at
cell-cell signaling	1	Cfa.16455.1.S1_at
regulation of plasma lipoprotein particle levels	1	Cfa.6294.1.A1_at
anatomical structure formation involved in morphogenesis	1	Cfa.21325.1.S1_s_at
cell population proliferation	1	Cfa.21325.1.S1_s_at
glycosylation	1	Cfa.15827.1.S1_s_at
positive regulation of immune system process	1	Cfa.16455.1.S1_at
plasma lipoprotein particle organization	1	Cfa.6294.1.A1_at
actin filament-based process	1	Cfa.21325.1.S1_s_at
regulation of immune system process	1	Cfa.16455.1.S1_at
anatomical structure morphogenesis	1	Cfa.21325.1.S1_s_at
immune effector process	1	Cfa.21325.1.S1_s_at
multi-organism reproductive process	1	Cfa.21325.1.S1_s_at
cellular homeostasis	1	Cfa.16455.1.S1_at
positive regulation of transport	1	Cfa.18640.1.S1_at
cell adhesion	1	Cfa.21325.1.S1_s_at
regulation of transferase activity	1	Cfa.21325.1.S1_s_at
multi-multicellular organism process	1	Cfa.21325.1.S1_s_at
cell death	1	Cfa.21325.1.S1_s_at
cellular developmental process	1	Cfa.21325.1.S1_s_at
regulation of developmental process	1	Cfa.21325.1.S1_s_at
embryo implantation	1	Cfa.21325.1.S1_s_at
negative regulation of locomotion	1	Cfa.16455.1.S1_at
negative regulation of multicellular organismal process	1	Cfa.16455.1.S1_at
multicellular organismal homeostasis	1	CfaAffx.16198.1.S1_s_at
transmembrane transport	1	Cfa.18640.1.S1_at
positive regulation of lipid localization	1	Cfa.18640.1.S1_at
positive regulation of locomotion	1	Cfa.16455.1.S1_at
multicellular organism development	1	Cfa.21325.1.S1_s_at
cellular localization	1	Cfa.21325.1.S1_s_at
anatomical structure development	1	Cfa.21325.1.S1_s_at
response to endogenous stimulus	1	Cfa.16455.1.S1_at
vesicle-mediated transport	1	Cfa.21325.1.S1_s_at
cell killing	1	Cfa.21325.1.S1_s_at

## Sheet: Table-S7B
Table-S7B: Gene Ontology (GO) analysis of 11 DEGs (annotated for molecular function) in LPS treated IBD enteroids versus LPS treated tumor enteroids.
GO-Terms	#Seqs	Probe Set ID
Metal ion binding	4	CfaAffx.13785.1.S1_at, CfaAffx.14168.1.S1_s_at, Cfa.496.1.A1_s_at, Cfa.6413.1.A1_at
Receptor ligand activity	4	Cfa.15806.1.S1_at, CfaAffx.31015.1.S1_at, Cfa.16455.1.S1_at, CfaAffx.16198.1.S1_s_at
Peptidase inhibitor activity	3	Cfa.4456.1.S1_at, Cfa.3780.1.S1_at, CfaAffx.15227.1.S1_s_at
G protein-coupled receptor binding	3	Cfa.15806.1.S1_at, CfaAffx.31015.1.S1_at, Cfa.16455.1.S1_at
Cytokine receptor binding	3	Cfa.15806.1.S1_at, CfaAffx.31015.1.S1_at, Cfa.16455.1.S1_at
Endopeptidase regulator activity	3	Cfa.4456.1.S1_at, Cfa.3780.1.S1_at, CfaAffx.15227.1.S1_s_at
Hydro-lyase activity	2	CfaAffx.13785.1.S1_at, Cfa.6413.1.A1_at
Transferase activity, transferring acyl groups other than amino-acyl groups	1	CfaAffx.4748.1.S1_at
Calcium-dependent phospholipid binding	1	CfaAffx.14168.1.S1_s_at
Sterol binding	1	Cfa.6294.1.A1_at
Acid-thiol ligase activity	1	Cfa.18640.1.S1_at
Thiolester hydrolase activity	1	CfaAffx.4748.1.S1_at
Lipase inhibitor activity	1	Cfa.12271.1.A1_at
Sulfotransferase activity	1	CfaAffx.4011.1.S1_at
Carboxylic ester hydrolase activity	1	CfaAffx.13785.1.S1_at
Hydrolase activity, acting on acid anhydrides, in phosphorus-containing anhydrides	1	Cfa.18640.1.S1_at
CoA-ligase activity	1	Cfa.18640.1.S1_at
Cholesterol binding	1	Cfa.6294.1.A1_at
Phosphoric ester hydrolase activity	1	Cfa.6996.1.A1_at
Kinase binding	1	Cfa.21325.1.S1_s_at
Fibroblast growth factor binding	1	Cfa.16455.1.S1_at
Phosphatidylcholine-sterol O-acyltransferase activator activity	1	Cfa.6294.1.A1_at
Transferase activity, transferring hexosyl groups	1	Cfa.15827.1.S1_s_at

## Sheet: Table-S7C
Table-S7C: Gene Ontology (GO) analysis of 11 DEGs (annotated for cellular component) in LPS treated IBD enteroids versus LPS treated tumor enteroids.
GO-Terms	#Seqs	Probe Set ID
Intracellular organelle	4	CfaAffx.4748.1.S1_at, Cfa.15827.1.S1_s_at, Cfa.18640.1.S1_at, Cfa.21325.1.S1_s_at
Plasma membrane	4	Cfa.7074.1.A1_at, Cfa.6996.1.A1_at, Cfa.18640.1.S1_at, Cfa.21325.1.S1_s_at
Integral component of membrane	4	Cfa.15827.1.S1_s_at, CfaAffx.3936.1.S1_at, Cfa.18640.1.S1_at, Cfa.21325.1.S1_s_at
Membrane-bounded organelle	4	CfaAffx.4748.1.S1_at, Cfa.15827.1.S1_s_at, Cfa.18640.1.S1_at, Cfa.21325.1.S1_s_at
Golgi apparatus subcompartment	2	Cfa.15827.1.S1_s_at, Cfa.21325.1.S1_s_at
Apical plasma membrane	2	Cfa.7074.1.A1_at, Cfa.21325.1.S1_s_at
Organelle membrane	2	Cfa.15827.1.S1_s_at, Cfa.21325.1.S1_s_at
Intracellular organelle lumen	1	Cfa.18640.1.S1_at
Intracellular vesicle	1	Cfa.21325.1.S1_s_at
Plasma lipoprotein particle	1	Cfa.6294.1.A1_at
Membrane microdomain	1	Cfa.21325.1.S1_s_at
Mitochondrion	1	Cfa.18640.1.S1_at
Lipoprotein particle	1	Cfa.6294.1.A1_at
Intracellular non-membrane-bounded organelle	1	Cfa.18640.1.S1_at
Cytoplasmic vesicle	1	Cfa.21325.1.S1_s_at
Non-membrane-bounded organelle	1	Cfa.18640.1.S1_at
Microbody	1	CfaAffx.4748.1.S1_at
Organelle lumen	1	Cfa.18640.1.S1_at
Endoplasmic reticulum	1	Cfa.18640.1.S1_at

## Sheet: Table-S7D
Table-S7D: Details about top upregulated anddownregulated DEGs in LPS treated IBD enteroids versus LPS treated tumor enteroids.
Probe Set ID	Gene Description	Gene Symbol
CfaAffx.13785.1.S1_at	carbonic anhydrase 1 isoform X1	CA1 (CfaAffx.13785.1.S1_at)
Cfa.6413.1.A1_at	carbonic anhydrase 1 isoform X3	CA1 (CfaAffx.13785.1.S1_at)
CfaAffx.31015.1.S1_at	C-C motif chemokine 25	CCL25
CfaAffx.4011.1.S1_at	sulfotransferase 1C1	SULT1C1
Cfa.7074.1.A1_at	mucin-1 isoform X2	MUC1
Cfa.16455.1.S1_at	C-X-C motif chemokine 13	CXCL13
Cfa.15827.1.S1_s_at	3-galactosyl-N-acetylglucosaminide 4-alpha-L-fucosyltransferase FUT3-like	FUT3
Cfa.4456.1.S1_at	proSAAS	PCSK1N
Cfa.496.1.A1_s_at	collagen alpha-2(V) chain	COL5A2
CfaAffx.15227.1.S1_s_at	WAP four-disulfide core domain protein 2	WFDC2
CfaAffx.14168.1.S1_s_at	annexin A10	ANXA10
CfaAffx.3936.1.S1_at	HEPACAM family member 2 isoform X1	HEPACAM2
Cfa.5989.1.A1_s_at	alpha-1-antitrypsin-like	SERPINA1
CfaAffx.16198.1.S1_s_at	trefoil factor 1	TFF1
Cfa.3780.1.S1_at	WAP four-disulfide core domain protein 2	WFDC2
CfaAffx.9034.1.S1_s_at	ENSCAFT00000008689 XM_022406088.1 PREDICTED: Canis lupus familiaris Fc fragment of IgG binding protein (FCGBP)	FCGBP
Cfa.12271.1.A1_at	uteroglobin	SCGB1A1
Cfa.21325.1.S1_s_at	epithelial membrane protein 2	EMP2
CfaAffx.8210.1.S1_at	ENSCAFT00000007801 XM_022408371.1 PREDICTED: Canis lupus familiaris olfactomedin 4 (OLFM4)	OLFM4
Cfa.10909.1.A1_at	39S ribosomal protein S30, mitochondrial	MRPS30
Cfa.15806.1.S1_at	C-C motif chemokine 25	CCL25
Cfa.18640.1.S1_at	long-chain-fatty-acid--CoA ligase 5	ACSL5
CfaAffx.4748.1.S1_at	bile acid-CoA:amino acid N-acyltransferase-like	BAAT
Cfa.6996.1.A1_at	ectonucleotide pyrophosphatase/phosphodiesterase family member 6	ENPP6
Cfa.6294.1.A1_at	apolipoprotein A-IV	APOA4
