# Supplementary material for: Differential Transcriptomic Profiles in Canine Intestinal Organoids Following Lipopolysaccharide Stimulation
Source: Research Square preprint supplement (doi:10.21203/rs.3.rs-967308/v1), 2022-01-05
Supplement: Supplementary file 4 [file eb9274ee23518d4497ff062b.xlsx]

## Sheet: Table-S3A
Table-S3A: Gene Ontology (GO) analysis of 11 DEGs (annotated for biological process) in LPS treated IBD colonoids versus control IBD colonoids.
GO-Terms	#Seqs	Probe Set ID
Primary metabolic process	3	Cfa.19154.1.S1_a_at, Cfa.6996.1.A1_at, CfaAffx.23153.1.S1_at
Nitrogen compound metabolic process	3	Cfa.19154.1.S1_a_at, Cfa.6996.1.A1_at, CfaAffx.23153.1.S1_at
Organic substance metabolic process	3	Cfa.19154.1.S1_a_at, Cfa.6996.1.A1_at, CfaAffx.23153.1.S1_at
Cellular metabolic process	2	Cfa.19154.1.S1_a_at, CfaAffx.23153.1.S1_at
Establishment of localization	2	CfaAffx.21162.1.S1_at, CfaAffx.13209.1.S1_s_at
Catabolic process	2	Cfa.6996.1.A1_at, CfaAffx.23153.1.S1_at
Macromolecule localization	1	CfaAffx.21162.1.S1_at
Collagen metabolic process	1	CfaAffx.23153.1.S1_at
Taxis	1	Cfa.3510.1.S1_s_at
Cellular homeostasis	1	CfaAffx.13209.1.S1_s_at
Cell activation	1	Cfa.3510.1.S1_s_at
Developmental growth	1	CfaAffx.23153.1.S1_at
Movement of cell or subcellular component	1	Cfa.3510.1.S1_s_at
Immune response	1	Cfa.3510.1.S1_s_at
Cell communication	1	Cfa.3510.1.S1_s_at
Biosynthetic process	1	Cfa.19154.1.S1_a_at
Cell adhesion	1	CfaAffx.14209.1.S1_s_at
Localization of cell	1	Cfa.3510.1.S1_s_at
Response to chemical	1	Cfa.3510.1.S1_s_at
Response to external stimulus	1	Cfa.3510.1.S1_s_at
Ossification	1	CfaAffx.23153.1.S1_at
Cellular response to stimulus	1	Cfa.3510.1.S1_s_at
Leukocyte activation	1	Cfa.3510.1.S1_s_at
Cellular component organization or biogenesis	1	CfaAffx.23153.1.S1_at
Biomineral tissue development	1	CfaAffx.23153.1.S1_at
Oxidation-reduction process	1	CfaAffx.13209.1.S1_s_at
Signal transduction	1	Cfa.3510.1.S1_s_at
Regulation of biological quality	1	CfaAffx.13209.1.S1_s_at
Leukocyte migration	1	Cfa.3510.1.S1_s_at
Organ growth	1	CfaAffx.23153.1.S1_at
Regulation of cellular process	1	Cfa.3510.1.S1_s_at
Cell motility	1	Cfa.3510.1.S1_s_at
Multicellular organism development	1	CfaAffx.23153.1.S1_at
Response to stress	1	Cfa.3510.1.S1_s_at
Small molecule metabolic process	1	Cfa.19154.1.S1_a_at
Anatomical structure development	1	CfaAffx.23153.1.S1_at
Anatomical structure morphogenesis	1	CfaAffx.23153.1.S1_at

## Sheet: Table-S3B
Table-S3B: Gene Ontology (GO) analysis of 11 DEGs (annotated for molecular function) in LPS treated IBD colonoids versus control IBD colonoids.
GO-Terms	#Seqs	Probe Set ID
Metal ion binding	3	CfaAffx.14209.1.S1_s_at, CfaAffx.13209.1.S1_s_at, CfaAffx.23153.1.S1_at
Phosphotransferase activity, phosphate group as acceptor	1	Cfa.19154.1.S1_a_at
Purine ribonucleoside triphosphate binding	1	CfaAffx.805.1.S1_s_at
Metallopeptidase activity	1	CfaAffx.23153.1.S1_at
G protein-coupled receptor binding	1	Cfa.3510.1.S1_s_at
Endopeptidase activity	1	CfaAffx.23153.1.S1_at
Receptor ligand activity	1	Cfa.3510.1.S1_s_at
Cytokine receptor binding	1	Cfa.3510.1.S1_s_at
Purine nucleotide binding	1	CfaAffx.805.1.S1_s_at
Phosphoric ester hydrolase activity	1	Cfa.6996.1.A1_at
Purine ribonucleotide binding	1	CfaAffx.805.1.S1_s_at
Sulfuric ester hydrolase activity	1	Cfa.6393.1.A1_at
Kinase activity	1	Cfa.19154.1.S1_a_at
Oxidoreductase activity, oxidizing metal ions, oxygen as acceptor	1	CfaAffx.13209.1.S1_s_at

## Sheet: Table-S3C
Table-S3C: Gene Ontology (GO) analysis of 11 DEGs (annotated for cellular component) in LPS treated IBD colonoids versus control IBD colonoids.
GO-Terms	#Seqs	Probe Set ID
Extracellular region	5	Cfa.3510.1.S1_s_at, CfaAffx.14209.1.S1_s_at, Cfa.6996.1.A1_at, CfaAffx.13209.1.S1_s_at, CfaAffx.23153.1.S1_at
Membrane	3	Cfa.9105.1.A1_s_at, CfaAffx.21162.1.S1_at, Cfa.6996.1.A1_at
Extracellular space	2	Cfa.3510.1.S1_s_at, CfaAffx.13209.1.S1_s_at
Intrinsic component of membrane	2	Cfa.9105.1.A1_s_at, CfaAffx.21162.1.S1_at
Cytoplasm	1	CfaAffx.21162.1.S1_at
Intracellular anatomical structure	1	CfaAffx.21162.1.S1_at
Organelle	1	CfaAffx.21162.1.S1_at
Organelle subcompartment	1	CfaAffx.21162.1.S1_at
Cell periphery	1	Cfa.6996.1.A1_at
Extracellular matrix	1	CfaAffx.23153.1.S1_at
Endomembrane system	1	CfaAffx.21162.1.S1_at

## Sheet: Table-S3D
Table-S3D: Details about top upregulated anddownregulated DEGs in LPS treated IBD colonoids versus control IBD colonoids.
Probe Set ID	Gene Description	Gene Symbol
CfaAffx.23153.1.S1_at	collagenase 3	MMP13
CfaAffx.21162.1.S1_at	dual oxidase maturation factor 2	DUOXA2
CfaAffx.13209.1.S1_s_at	ceruloplasmin	CP
Cfa.19154.1.S1_a_at	UMP-CMP kinase 2, mitochondrial	CMPK2
CfaAffx.14209.1.S1_s_at	thrombospondin-4	THBS4
Cfa.3510.1.S1_s_at	interleukin-8	CXCL8
Cfa.1679.1.A1_at	abl interactor 2 isoform X1	ABI2
CfaAffx.805.1.S1_s_at	ubiquitin-conjugating enzyme E2 E3	UBE2E3
Cfa.9105.1.A1_s_at	echinoderm microtubule-associated protein-like 2 isoform X5	EML2
Cfa.6393.1.A1_at	extracellular sulfatase Sulf-2-like	SULF2
Cfa.6996.1.A1_at	ectonucleotide pyrophosphatase/phosphodiesterase family member 6	ENPP6
