# Supplementary material for: Differential Transcriptomic Profiles in Canine Intestinal Organoids Following Lipopolysaccharide Stimulation
Source: Research Square preprint supplement (doi:10.21203/rs.3.rs-967308/v1), 2022-01-05
Supplement: Supplementary file 5 [file fe6e5e6f3f8f89571e68e9a3.xlsx]

## Sheet: Table-S5A
Table-S5A: Gene Ontology (GO) analysis of 11 DEGs (annotated for biological process) in control IBD enteroids versus control tumor enteroids.
GO-Terms	#Seqs	Probe Set ID
Organic substance metabolic process	11	Cfa.17835.1.S1_s_at, Cfa.3774.1.A1_s_at, CfaAffx.4748.1.S1_at, Cfa.3561.1.S1_at, Cfa.12226.1.A1_at, Cfa.20798.1.S1_at, Cfa.6294.1.A1_at, Cfa.20396.1.S1_at, Cfa.3780.1.S1_at, CfaAffx.15227.1.S1_s_at, CfaAffx.10947.1.S1_s_at
Primary metabolic process	11	Cfa.17835.1.S1_s_at, Cfa.3774.1.A1_s_at, CfaAffx.4748.1.S1_at, Cfa.12226.1.A1_at, Cfa.3561.1.S1_at, Cfa.20798.1.S1_at, Cfa.6294.1.A1_at, Cfa.20396.1.S1_at, Cfa.3780.1.S1_at, CfaAffx.15227.1.S1_s_at, CfaAffx.10947.1.S1_s_at
Nitrogen compound metabolic process	10	Cfa.17835.1.S1_s_at, Cfa.3774.1.A1_s_at, CfaAffx.4748.1.S1_at, Cfa.12226.1.A1_at, Cfa.20798.1.S1_at, Cfa.6294.1.A1_at, Cfa.20396.1.S1_at, Cfa.3780.1.S1_at, CfaAffx.15227.1.S1_s_at, CfaAffx.10947.1.S1_s_at
Cellular metabolic process	10	CfaAffx.13785.1.S1_at, Cfa.3774.1.A1_s_at, CfaAffx.4748.1.S1_at, Cfa.12226.1.A1_at, Cfa.6294.1.A1_at, Cfa.6413.1.A1_at, Cfa.20396.1.S1_at, Cfa.3780.1.S1_at, CfaAffx.15227.1.S1_s_at, CfaAffx.10947.1.S1_s_at
Regulation of cellular process	9	Cfa.3796.1.A1_s_at, Cfa.3774.1.A1_s_at, Cfa.12506.3.S1_at, Cfa.11274.1.A1_at, Cfa.12226.1.A1_at, Cfa.6294.1.A1_at, Cfa.3780.1.S1_at, CfaAffx.15227.1.S1_s_at, CfaAffx.10947.1.S1_s_at
Regulation of metabolic process	5	Cfa.12226.1.A1_at, Cfa.6294.1.A1_at, Cfa.3780.1.S1_at, CfaAffx.15227.1.S1_s_at, CfaAffx.10947.1.S1_s_at
Negative regulation of cellular process	5	Cfa.3796.1.A1_s_at, Cfa.12226.1.A1_at, Cfa.3780.1.S1_at, CfaAffx.15227.1.S1_s_at, CfaAffx.10947.1.S1_s_at
Small molecule metabolic process	5	CfaAffx.13785.1.S1_at, CfaAffx.4748.1.S1_at, Cfa.6294.1.A1_at, Cfa.6413.1.A1_at, Cfa.20396.1.S1_at
Regulation of molecular function	5	Cfa.12226.1.A1_at, Cfa.6294.1.A1_at, Cfa.3780.1.S1_at, CfaAffx.15227.1.S1_s_at, CfaAffx.10947.1.S1_s_at
Regulation of hydrolase activity	5	Cfa.12226.1.A1_at, Cfa.6294.1.A1_at, Cfa.3780.1.S1_at, CfaAffx.15227.1.S1_s_at, CfaAffx.10947.1.S1_s_at
Negative regulation of metabolic process	4	Cfa.12226.1.A1_at, Cfa.3780.1.S1_at, CfaAffx.15227.1.S1_s_at, CfaAffx.10947.1.S1_s_at
Negative regulation of catalytic activity	4	Cfa.12226.1.A1_at, Cfa.3780.1.S1_at, CfaAffx.15227.1.S1_s_at, CfaAffx.10947.1.S1_s_at
Cell communication	3	Cfa.3774.1.A1_s_at, Cfa.12506.3.S1_at, Cfa.11274.1.A1_at
Signal transduction	3	Cfa.3774.1.A1_s_at, Cfa.12506.3.S1_at, Cfa.11274.1.A1_at
Response to stress	3	Cfa.6294.1.A1_at, Cfa.3780.1.S1_at, CfaAffx.15227.1.S1_s_at
Biosynthetic process	3	CfaAffx.4748.1.S1_at, Cfa.6294.1.A1_at, Cfa.20396.1.S1_at
Cellular response to stimulus	3	Cfa.3774.1.A1_s_at, Cfa.12506.3.S1_at, Cfa.11274.1.A1_at
Macromolecule localization	2	Cfa.3796.1.A1_s_at, Cfa.6294.1.A1_at
Anatomical structure formation involved in morphogenesis	2	Cfa.3774.1.A1_s_at, CfaAffx.27421.1.S1_at
Establishment of localization	2	Cfa.3796.1.A1_s_at, Cfa.6294.1.A1_at
Cellular component organization or biogenesis	2	Cfa.6294.1.A1_at, CfaAffx.27421.1.S1_at
Catabolic process	2	Cfa.3774.1.A1_s_at, Cfa.6294.1.A1_at
Regulation of biological quality	2	Cfa.3774.1.A1_s_at, Cfa.6294.1.A1_at
System process	2	Cfa.3774.1.A1_s_at, Cfa.6294.1.A1_at
Anatomical structure morphogenesis	2	Cfa.3774.1.A1_s_at, CfaAffx.27421.1.S1_at
Response to biotic stimulus	2	Cfa.3780.1.S1_at, CfaAffx.15227.1.S1_s_at
Immune response	2	Cfa.3780.1.S1_at, CfaAffx.15227.1.S1_s_at
Positive regulation of cellular process	2	Cfa.3796.1.A1_s_at, Cfa.6294.1.A1_at
Response to chemical	2	Cfa.18759.1.S1_s_at, Cfa.6294.1.A1_at
Response to external stimulus	2	Cfa.3780.1.S1_at, CfaAffx.15227.1.S1_s_at
Regulation of localization	2	Cfa.3796.1.A1_s_at, Cfa.6294.1.A1_at
Cellular developmental process	2	Cfa.3774.1.A1_s_at, CfaAffx.27421.1.S1_at
Response to other organism	2	Cfa.3780.1.S1_at, CfaAffx.15227.1.S1_s_at
Multicellular organism development	2	Cfa.3774.1.A1_s_at, CfaAffx.27421.1.S1_at
Anatomical structure development	2	Cfa.3774.1.A1_s_at, CfaAffx.27421.1.S1_at
Negative regulation of transport	1	Cfa.3796.1.A1_s_at
Regulation of plasma lipoprotein particle levels	1	Cfa.6294.1.A1_at
Regulation of signaling	1	Cfa.12506.3.S1_at
Regulation of multicellular organismal process	1	Cfa.6294.1.A1_at
Negative regulation of establishment of protein localization	1	Cfa.3796.1.A1_s_at
Positive regulation of catalytic activity	1	Cfa.6294.1.A1_at
Plasma lipoprotein particle organization	1	Cfa.6294.1.A1_at
Ensheathment of neurons	1	CfaAffx.27421.1.S1_at
Biological process involved in symbiotic interaction	1	Cfa.3774.1.A1_s_at
Regulation of response to stimulus	1	Cfa.12506.3.S1_at
Positive regulation of transport	1	Cfa.3796.1.A1_s_at
Cell adhesion	1	Cfa.9240.1.S1_at
Digestion	1	Cfa.6294.1.A1_at
Ossification	1	Cfa.9240.1.S1_at
Oxidation-reduction process	1	Cfa.20396.1.S1_at
Cell death	1	CfaAffx.27421.1.S1_at
Cellular localization	1	Cfa.3796.1.A1_s_at
Positive regulation of metabolic process	1	Cfa.6294.1.A1_at
Positive regulation of establishment of protein localization	1	Cfa.3796.1.A1_s_at
Vesicle-mediated transport	1	Cfa.3796.1.A1_s_at

## Sheet: Table-S5B
Table-S5B: Gene Ontology (GO) analysis of 11 DEGs (annotated for molecular function) in control IBD enteroids versus control tumor enteroids.
GO-Terms	#Seqs	Probe Set ID
Ion binding	8	Cfa.3796.1.A1_s_at, CfaAffx.13785.1.S1_at, Cfa.3774.1.A1_s_at, Cfa.18759.2.S1_at, Cfa.18759.1.S1_s_at, Cfa.20798.1.S1_at, Cfa.6413.1.A1_at, Cfa.6294.1.A1_at
Hydrolase activity	5	CfaAffx.13785.1.S1_at, Cfa.17835.1.S1_s_at, Cfa.3774.1.A1_s_at, CfaAffx.4748.1.S1_at, Cfa.20798.1.S1_at
Enzyme regulator activity	5	Cfa.12226.1.A1_at, Cfa.6294.1.A1_at, Cfa.3780.1.S1_at, CfaAffx.15227.1.S1_s_at, CfaAffx.10947.1.S1_s_at
Protein binding	3	Cfa.12506.3.S1_at, Cfa.18759.1.S1_s_at, Cfa.11274.1.A1_at
Catalytic activity, acting on a protein	3	Cfa.17835.1.S1_s_at, Cfa.3774.1.A1_s_at, Cfa.20798.1.S1_at
Organic cyclic compound binding	2	Cfa.5781.1.A1_s_at, Cfa.6294.1.A1_at
Transferase activity	2	CfaAffx.4748.1.S1_at, CfaAffx.4011.1.S1_at
Lyase activity	2	CfaAffx.13785.1.S1_at, Cfa.6413.1.A1_at
Lipid binding	2	Cfa.3796.1.A1_s_at, Cfa.6294.1.A1_at

## Sheet: Table-S5C
Table-S5C: Gene Ontology (GO) analysis of 11 DEGs (annotated for cellular component) in control IBD enteroids versus control tumor enteroids.
GO-Terms	#Seqs	Probe Set ID
Intracellular anatomical structure	12	Cfa.3796.1.A1_s_at, CfaAffx.26061.1.S1_at, CfaAffx.13785.1.S1_at, Cfa.17835.1.S1_s_at, Cfa.3774.1.A1_s_at, Cfa.7074.1.A1_at, CfaAffx.4748.1.S1_at, Cfa.12506.3.S1_at, Cfa.18759.1.S1_s_at, Cfa.11274.1.A1_at, Cfa.6413.1.A1_at, Cfa.20396.1.S1_at
Cytoplasm	10	Cfa.3796.1.A1_s_at, CfaAffx.13785.1.S1_at, CfaAffx.26061.1.S1_at, Cfa.3774.1.A1_s_at, CfaAffx.4748.1.S1_at, Cfa.12506.3.S1_at, Cfa.18759.1.S1_s_at, Cfa.11274.1.A1_at, Cfa.6413.1.A1_at, Cfa.20396.1.S1_at
Membrane	10	Cfa.3796.1.A1_s_at, CfaAffx.26061.1.S1_at, Cfa.17835.1.S1_s_at, Cfa.3774.1.A1_s_at, Cfa.7074.1.A1_at, Cfa.18759.1.S1_s_at, Cfa.3561.1.S1_at, CfaAffx.27421.1.S1_at, Cfa.10739.1.A1_s_at, Cfa.20396.1.S1_at
Extracellular region	9	Cfa.3774.1.A1_s_at, Cfa.12506.3.S1_at, Cfa.18759.1.S1_s_at, Cfa.12226.1.A1_at, Cfa.9240.1.S1_at, Cfa.6294.1.A1_at, Cfa.3780.1.S1_at, CfaAffx.15227.1.S1_s_at, CfaAffx.10947.1.S1_s_at
Organelle	8	Cfa.3796.1.A1_s_at, CfaAffx.26061.1.S1_at, Cfa.17835.1.S1_s_at, Cfa.3774.1.A1_s_at, CfaAffx.4748.1.S1_at, Cfa.12506.3.S1_at, Cfa.18759.1.S1_s_at, Cfa.20396.1.S1_at
Intrinsic component of membrane	7	CfaAffx.26061.1.S1_at, Cfa.17835.1.S1_s_at, Cfa.3774.1.A1_s_at, Cfa.3561.1.S1_at, Cfa.10739.1.A1_s_at, CfaAffx.27421.1.S1_at, Cfa.20396.1.S1_at
Extracellular space	6	Cfa.3774.1.A1_s_at, Cfa.12506.3.S1_at, Cfa.18759.1.S1_s_at, Cfa.6294.1.A1_at, Cfa.3780.1.S1_at, CfaAffx.15227.1.S1_s_at
Cell periphery	6	Cfa.3796.1.A1_s_at, CfaAffx.26061.1.S1_at, Cfa.3774.1.A1_s_at, Cfa.7074.1.A1_at, Cfa.18759.1.S1_s_at, CfaAffx.27421.1.S1_at
Apical part of cell	3	Cfa.3796.1.A1_s_at, CfaAffx.26061.1.S1_at, Cfa.7074.1.A1_at
Cytosol	2	CfaAffx.4748.1.S1_at, Cfa.18759.1.S1_s_at
Membrane-enclosed lumen	2	Cfa.3796.1.A1_s_at, Cfa.18759.1.S1_s_at
Endomembrane system	2	Cfa.3796.1.A1_s_at, Cfa.12506.3.S1_at

## Sheet: Table-S5D
Table-S5D: Details about top upregulated anddownregulated DEGs in control IBD enteroids versus control tumor enteroids.
Probe Set ID	Gene Description	Gene Symbol
CfaAffx.4011.1.S1_at	sulfotransferase 1C1	SULT1C1
Cfa.9240.1.S1_at	osteopontin isoform X2	SPP1
CfaAffx.13785.1.S1_at	carbonic anhydrase 1 isoform X1	CA1 (CfaAffx.13785.1.S1_at)
CfaAffx.26061.1.S1_at	mucin-1	MUC1
Cfa.6413.1.A1_at	carbonic anhydrase 1 isoform X3	CA1 (Cfa.6413.1.A1_at)
Cfa.12506.3.S1_at	insulin-like growth factor-binding protein 1	IGFBP1
Cfa.18759.2.S1_at	protein S100-A16	S100A16
Cfa.20396.1.S1_at	fatty acyl-CoA reductase 1	FAR1
Cfa.11274.1.A1_at	protein BEX5	BEX5
CfaAffx.15227.1.S1_s_at	WAP four-disulfide core domain protein 2	WFDC2
Cfa.5781.1.A1_s_at	RNA-binding motif, single-stranded-interacting protein 1 isoform X3	RBMS1
CfaAffx.22155.1.S1_s_at	ENSCAFT00000022799 XM_014110988.1 PREDICTED: Canis lupus familiaris fibronectin 1 (FN1), transcript variant X1, mRNA	FN1
Cfa.3780.1.S1_at	WAP four-disulfide core domain protein 2	WFDC2
Cfa.12226.1.A1_at	double-headed protease inhibitor, submandibular gland	LOC111092171
Cfa.17835.1.S1_s_at	serine protease 23	PRSS23
Cfa.18759.1.S1_s_at	protein S100-A16	S100A16
Cfa.10739.1.A1_s_at	cell adhesion molecule 1 isoform X6	Cadm1
CfaAffx.10947.1.S1_s_at	double-headed protease inhibitor, submandibular gland	LOC111092171
CfaAffx.27421.1.S1_at	peripheral myelin protein 22	PMP22
Cfa.3561.1.S1_at	neutral and basic amino acid transport protein rBAT	SLC3A1
CfaAffx.4748.1.S1_at	bile acid-CoA:amino acid N-acyltransferase-like	BAAT
Cfa.20798.1.S1_at	aminopeptidase N	ANPEP (Cfa.20798.1.S1_at)
Cfa.3774.1.A1_s_at	aminopeptidase N	ANPEP (Cfa.3774.1.A1_s_at)
Cfa.6294.1.A1_at	apolipoprotein A-IV	APOA4
Cfa.3796.1.A1_s_at	annexin A13 isoform X1	ANXA13
